# Supplementary material for: Glycinebetaine Biosynthesis in Response to Osmotic Stress Depends on Jasmonate Signaling in Watermelon Suspension Cells
Source: Front Plant Sci. 2018 Oct 12;9:1469. doi: 10.3389/fpls.2018.01469 (PMC6194323; doi:10.3389/fpls.2018.01469)
Supplement: Supplementary file 4 [file Table_2.XLS]

## Sheet: Sheet1
Table S2. List of domain hits of BADH protein
Name	Accession	Description	Interval	E-value
PLN02467	PLN02467	betaine aldehyde dehydrogenase	1-503	0
ALDH_F10_BADH	cd07110	Arabidopsis betaine aldehyde dehydrogenase 1 and 2, ALDH family 10A8 and 10A9-like	27-487	0
Aldedh	Pfam00171	Aldehyde dehydrogenase family	16-485	0
AdhE	COG1012	Acyl-CoA reductase or other NAD-dependent aldehyde dehydrogenase [Energy production and conversion]	9-491	0
BADH	TIGR01804	betaine-aldehyde dehydrogenase	11-483	1.83e-177
